# Supplementary material
Source: MDPI journal article supplement (https://www.mdpi.com/2077-0472/14/4/627)
Supplement: s1 [file s1]

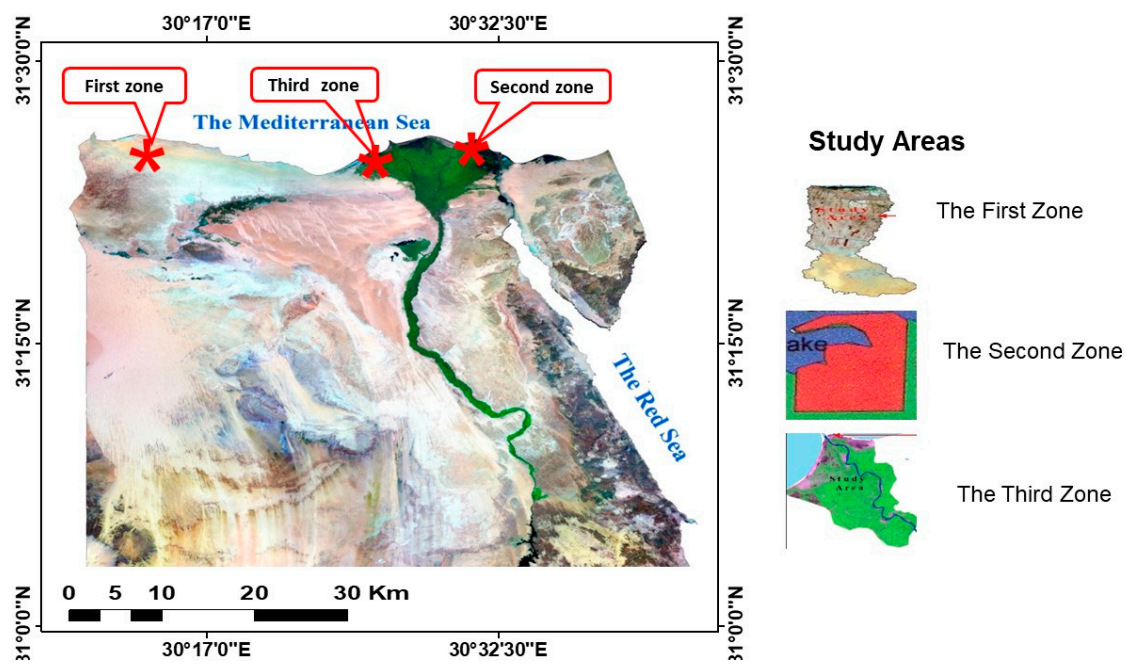

**Figure S1:** Location of study areas.

**Table S1** Scores of chemical properties parameters

| Indicator                                                                                                                                                           | Description            | Threshold | Score |
|---------------------------------------------------------------------------------------------------------------------------------------------------------------------|------------------------|-----------|-------|
| <b>Chemical quality index (CQI) = <math>[\text{pH} \times \text{EC} \times \text{CaCO}_3 \times \text{ESP} \times \text{CEC} \times \text{Gypsum}]^{1/6}</math></b> |                        |           |       |
| <b>pH<sup>1</sup></b>                                                                                                                                               | Neutral                | 6.6-7.3   | 1.0   |
|                                                                                                                                                                     | Slightly alkaline      | 7.3-7.8   | 0.8   |
|                                                                                                                                                                     | Moderately alkaline    | 7.8-8.4   | 0.6   |
|                                                                                                                                                                     | Strongly alkaline      | 8.4-9     | 0.4   |
|                                                                                                                                                                     | Very strongly alkaline | > 9       | 0.2   |
| <b>EC, dS/m<sup>2</sup></b>                                                                                                                                         | Non-saline             | < 2       | 1.0   |
|                                                                                                                                                                     | Very slightly saline   | 2-4       | 0.8   |
|                                                                                                                                                                     | Slightly saline        | 4-8       | 0.6   |
|                                                                                                                                                                     | Moderately saline      | 8-16      | 0.4   |
|                                                                                                                                                                     | Strongly saline        | > 16      | 0.2   |
| <b>CaCO<sub>3</sub> , %<sup>3</sup></b>                                                                                                                             | Non-calcareous         | 0         | 0.2   |
|                                                                                                                                                                     | Slightly calcareous    | 0-2       | 1.0   |
|                                                                                                                                                                     | Moderately calcareous  | 2-10      | 0.8   |
|                                                                                                                                                                     | Strongly calcareous    | 10-25     | 0.6   |
|                                                                                                                                                                     | Extremely calcareous   | > 25      | 0.4   |
| <b>ESP, %<sup>4</sup></b>                                                                                                                                           | Non-sodic              | < 10      | 1.0   |
|                                                                                                                                                                     | Slightly sodic         | 10-15     | 0.8   |
|                                                                                                                                                                     | Moderately sodic       | 15-30     | 0.6   |
|                                                                                                                                                                     | Strongly sodic         | 30-50     | 0.4   |
|                                                                                                                                                                     | Very strongly sodic    | > 50      | 0.2   |
| <b>CEC, cmol<sub>e</sub>/kg<sup>5</sup></b>                                                                                                                         | Very high              | < 6       | 1.0   |
|                                                                                                                                                                     | High                   | 6-12      | 0.8   |
|                                                                                                                                                                     | Moderate               | 12-25     | 0.6   |
|                                                                                                                                                                     | Low                    | 25-40     | 0.4   |
|                                                                                                                                                                     | Very low               | > 40      | 0.2   |
| <b>Gypsum %<sup>3</sup></b>                                                                                                                                         | Non-gypsic             | 0         | 0.2   |
|                                                                                                                                                                     | Slightly gypsic        | 0-5       | 1.0   |
|                                                                                                                                                                     | Moderately gypsic      | 5-15      | 0.8   |
|                                                                                                                                                                     | Strongly gypsic        | 15-60     | 0.6   |
|                                                                                                                                                                     | Extremely gypsic       | > 60      | 0.4   |

**Table S2** Scores of physical properties parameters

| Indicator                                                                                     | Description                             | Threshold        | Score |
|-----------------------------------------------------------------------------------------------|-----------------------------------------|------------------|-------|
| <b>Physical Quality Index (PQI) = [Depth × Slope × Texture × BD × WHC × HC]<sup>1/6</sup></b> |                                         |                  |       |
| <b>Depth, cm<sup>3</sup></b>                                                                  | Very deep                               | > 150            | 1.0   |
|                                                                                               | Deep                                    | 150-100          | 0.8   |
|                                                                                               | Moderately deep                         | 100-50           | 0.6   |
|                                                                                               | Shallow                                 | 50-30            | 0.4   |
|                                                                                               | Very shallow                            | < 30             | 0.2   |
| <b>Slope, %</b>                                                                               | Very gently sloping                     | < 2              | 1.0   |
|                                                                                               | Gently sloping                          | 2-5              | 0.8   |
|                                                                                               | Sloping                                 | 5-10             | 0.6   |
|                                                                                               | Strongly sloping                        | 10-15            | 0.5   |
|                                                                                               | Moderately steep                        | 15-30            | 0.4   |
|                                                                                               | Steep                                   | > 30             | 0.2   |
| <b>Texture<sup>5</sup></b>                                                                    | Clay loam                               |                  | 1.0   |
|                                                                                               | Silty clay loam, loam, silty clay, silt |                  | 0.9   |
|                                                                                               | Silt loam, clay < 60%                   |                  | 0.8   |
|                                                                                               | Sandy clay, sandy clay loam, sandy loam |                  | 0.7   |
|                                                                                               | Clay > 60%                              |                  | 0.6   |
|                                                                                               | Loamy sand                              |                  | 0.4   |
| <b>Bulk Density (BD)<sup>5</sup>, g/cm<sup>3</sup></b>                                        | Sand                                    |                  | 0.2   |
|                                                                                               | Very low                                | < 1.2            | 1.0   |
|                                                                                               | Low                                     | 1.2-1.4          | 0.8   |
|                                                                                               | Moderate                                | 1.4-1.6          | 0.6   |
|                                                                                               | High                                    | 1.6-1.8          | 0.4   |
|                                                                                               | Very high                               | > 1.8            | 0.2   |
| <b>Water holding capacity (WHC)<sup>5</sup></b>                                               | Very high                               | > 35             | 1.0   |
|                                                                                               | High                                    | 35-30            | 0.8   |
|                                                                                               | Moderate                                | 30-20            | 0.6   |
|                                                                                               | Low                                     | 20-15            | 0.4   |
|                                                                                               | Very low                                | < 15             | 0.2   |
| <b>Hydraulic conductivity (HC)<sup>3</sup>, cm/hr</b>                                         | Low                                     | 1.0-2.0          | 1.0   |
|                                                                                               | Moderate                                | 2.0-6.0          | 0.8   |
|                                                                                               | Very low                                | 0.05-1.0         | 0.6   |
|                                                                                               | High                                    | 6.0-12.0         | 0.4   |
|                                                                                               | Extremely low – very high               | < 0.05 or > 12.0 | 0.2   |

**Table S3** Scores of fertility properties parameters

| Indicator                                                        | Description  | Threshold |         |       | Score |
|------------------------------------------------------------------|--------------|-----------|---------|-------|-------|
| Fertility Quality Index (FQI) = [N × P × K × OM ] <sup>1/4</sup> |              |           |         |       |       |
| Available N <sup>2</sup> ,<br>mg/kg                              | Very high    |           | >120    |       | 1.0   |
|                                                                  | High         |           | 120-100 |       | 0.8   |
|                                                                  | Moderate     |           | 100-75  |       | 0.6   |
|                                                                  | Low          |           | 75-30   |       | 0.4   |
|                                                                  | Very low     |           | <30     |       | 0.2   |
| Available P <sup>6</sup> ,<br>mg/kg                              | Soil texture | Light     | Medium  | Heavy |       |
|                                                                  | Very high    | >15       | >8      | >5    | 1.00  |
|                                                                  | High         | 15-10     | 8-5     | 5-3   | 0.75  |
|                                                                  | Medium       | 10-5      | 5-3     | 3-2   | 0.50  |
|                                                                  | Low          | <5        | <3      | <2    | 0.25  |
| Available K <sup>6</sup> ,<br>mg/kg                              | Very high    |           | > 180   |       | 1.00  |
|                                                                  | High         |           | 180-120 |       | 0.75  |
|                                                                  | Medium       |           | 120-60  |       | 0.50  |
|                                                                  | Low          |           | < 60    |       | 0.25  |
| OM <sup>7</sup>                                                  | Very high    |           | > 2     |       | 1.00  |
|                                                                  | High         |           | 2-1     |       | 0.75  |
|                                                                  | Medium       |           | 1-0.5   |       | 0.50  |
|                                                                  | Low          |           | < 0.5   |       | 0.25  |

<sup>1</sup>Soil science division (2017); <sup>2</sup>Yao et al. (2013); <sup>3</sup>FAO (2006); <sup>4</sup>FAO (1988); <sup>5</sup>Hazelton and Murphy (2016); <sup>6</sup>Soltanpour (1991); <sup>7</sup>Mohamed et al. (2020).

**Table S4** Final SQ range of study area

| Index       | Values      | Symbol | Classes                        |
|-------------|-------------|--------|--------------------------------|
| Final<br>SQ | $\geq 0.61$ | C1     | Highly (very high) quality     |
|             | 0.53 – 0.60 | C2     | Moderately high (high) quality |
|             | 0.45 – 0.52 | C3     | Moderate quality               |
|             | 0.37 – 0.44 | C4     | Moderately low quality         |
|             | $\leq 0.36$ | C5     | Low quality                    |
